# Supplementary material for: Transvaginal natural orifice transluminal endoscopic surgery (vNOTES) adnexectomy for benign pathology compared with laparoscopic excision (NOTABLE): a protocol for a randomised controlled trial
Source: PubMed Central journal article supplement — BMJ Open. 2018 Jan 10;8(1):e018059. doi: 10.1136/bmjopen-2017-018059 (PMC5780723; doi:10.1136/bmjopen-2017-018059), 2018-01-10
Supplement: bmjopen-2017-018059supp001.pdf [file bmjopen-2017-018059supp001.pdf]

Oprichtgever: Afdeling Verloskunde/Gynaecologie Imeldaziekenhuis Bonheiden  
Onderzoeksinstelling: Afdeling Verloskunde/Gynaecologie Imeldaziekenhuis Bonheiden  
Comité voor Medische Ethiek: Commissie Medisch Ethiek Imeldaziekenhuis Bonheiden  
Lokale artsen-onderzoekers: Dr Jan Baekelandt en Dr Jan Bosteels, Imeldaziekenhuis Bonheiden, tel 015 505011  
Studie secretaresse: Mevrouw Sofie De Wit, Imeldaziekenhuis Bonheiden, tel 015 505926

## **I Noodzakelijke informatie voor Uw beslissing om deel te nemen aan de NOTABLE studie**

### **Inleiding**

U wordt uitgenodigd om deel te nemen aan een klinische studie voor het vergelijken van twee technieken voor het verwijderen van een goedaardige eierstokcyste.

De artsen-onderzoekers hopen dat deze blind vergelijkende studie voordelen kan bieden voor de behandeling van patiënten die getroffen zijn door dezelfde aandoening als u. Er is evenwel geen enkele garantie dat Uw deelname aan deze studie U voordeel zal opleveren.

Voordat U beslist over Uw deelname aan deze studie willen we U wat meer informatie geven over wat dit betekent op organisatorisch vlak en wat de eventuele voordelen en risico's voor U zijn. Zo kan U een beslissing nemen op basis van de juiste informatie. Dit wordt "geïnformeerde toestemming" genoemd.

Wij vragen U de volgende pagina's met informatie aandachtig te lezen. Hebt U vragen, dan kan U terecht bij de arts-onderzoeker of zijn of haar vertegenwoordiger. Dit document bestaat uit drie delen: essentiële informatie die U nodig heeft voor het nemen van Uw beslissing, Uw schriftelijke toestemming en bijlagen waarin U meer details terugvindt over bepaalde onderdelen van de basisinformatie.

### **Als U aan de NOTABLE studie deelneemt, dient U het volgende te weten:**

- Deze klinische studie wordt opgestart na evaluatie door één of meerdere ethische comité(s).
- Uw deelname is vrijwillig; er kan op geen enkele manier sprake zijn van dwang. Voor deelname is Uw ondertekende toestemming nodig. Ook nadat U hebt getekend, kan u de arts-onderzoeker laten weten dat U Uw deelname wilt stopzetten. De beslissing om al dan niet (verder) deel te nemen zal geen enkele negatieve invloed hebben op de kwaliteit van de zorgen noch op de relatie met de behandelende arts(en).
- De gegevens die in het kader van Uw deelname worden verzameld, zijn vertrouwelijk. Bij de publicatie van de resultaten is Uw anonimiteit verzekerd.
- Er worden U geen bijkomende kosten aangerekend voor specifieke behandelingen, bezoeken / consultaties, onderzoeken in het kader van dit onderzoek. De uitgevoerde chirurgische procedures worden terugbetaald in het kader van de ziekteverzekering.
- Eventuele schade opgelopen in het kader van Uw deelname aan deze klinische studie valt onder de verzekeringspolis van Uw behandelende arts. Omdat het een niet-commerciële studie betreft, werd hiervoor een bijkomende verzekeringspolis afgesloten met de verzekeringsmaatschappij van de behandelende hoofdonderzoeker.
- Indien U extra informatie wenst, kan U altijd contact opnemen met de arts-onderzoekers of een medewerker van hun team.

Aanvullende informatie over Uw rechten als deelnemer aan een klinische studie kan U bekomen via de ombudsdienst van het Imeldaziekenhuis te Bonheiden bij mevrouw Ilse Creemers bereikbaar via telefoon 015 505015 of via e-mail [ombudsdienst@imelda.be](mailto:ombudsdienst@imelda.be).

## **Doelstelling en beschrijving van het studieprotocol**

Wij nodigen U uit om deel te nemen aan een klinische studie inzake de klassieke laparoscopische (via de navel in de buikwand) vergeleken met de transvaginale (doorheen de vagina) verwijdering van één of beide adnexen (eierstok én eileider) bij vermoeden van een goedaardige cyste van één of beide eierstokken bij ongeveer 66 vrouwelijke deelnemers in België.

Alle vrouwen met een op echografie vermoede goedaardige cyste van één of beide eierstokken kunnen deelnemen aan de studie ongeacht de leeftijd en het aantal bevallingen in de voorgeschiedenis. Deelname aan deze studie is niet mogelijk bij een voorgeschiedenis van verwijdering van de baarmoeder, heekunde aan de endeldarm, endometriose van het rectovaginaal septum, vermoeden van eierstokkanker, voorgeschiedenis van PID of pelvien abces, actieve genitale infectie of vrouwen die nog nooit sexueel contact hebben gehad. Zwaarlijvigheid, nullipariteit (nooit eerder langs natuurlijke weg bevallen) of grootte van de cyste zijn dan weer geen reden tot uitsluiten van deelname aan de studie.

Het is een gerandomizeerde studie die een alternatieve toegangsweg (NOTES transvaginaal) vergelijkt met de huidige gouden standaard van de klassieke transabdominale laparoscopische toegangsweg voor het verwijderen van één of beide adnexen (eierstok met eileider). In een eerdere pilotstudie werd de technische haalbaarheid van deze transvaginale toegangsweg beschreven. Deze gevallenreeks verzamelde de gegevens van 20 uitgevoerde procedures. Het bleek mogelijk om op een veilige manier cysten te verwijderen tot een doormeter van 11 cm. Men observeerde lagere pijnscores bij vrouwen behandeld via deze nieuwe toegangsweg. De hypothese van deze studie is dat de nieuwe techniek minstens even succesvol is dan de klassieke gouden standaard maar het voordeel zou kunnen bieden dat meer vrouwen die via de nieuwe techniek werden behandeld zelf zouden kiezen om dezelfde dag van de ingreep naar huis terug te keren vergeleken met de standaardtechniek. Een tweede bijkomend voordeel zou kunnen zijn dat vrouwen behandeld met de nieuwe techniek minder pijn hebben vergeleken met de gouden standaard. In deze studie zal via een techniek van randomizatie worden beslist of een deelnemer behandeld wordt op de klassieke wijze dan wel via de nieuwe techniek. De ingreep wordt uitgevoerd door één chirurg die een even grote ervaring heeft in het uitvoeren van beide technieken. De studie verloopt geblindeerd voor de deelnemers en de effect beoordeelaars. Het meten van pijn is namelijk subjectief en kan worden verstoord wanneer de deelnemer aan de studie of de effectbeoordeelaar voorkennis heeft van de uitgevoerde procedure. In alle gevallen wordt daarom een insnede aangebracht in de navel zodat niemand behalve de chirurg weet welke ingreep werd uitgevoerd. Indien deze methodiek niet zou worden toegepast, zou het uiteindelijk nooit mogelijk zijn om betrouwbaar de doeltreffendheid van de nieuwe techniek versus de standaardtechniek te vergelijken. Het oplossen van deze onzekerheid is net de hoofdbedoeling van de huidige studie. Na het uitvoeren van de ingreep wordt standaard medische en verpleegkundige zorg toegediend (antibiotica, pijnstilling, wondzorg,...). Deze is identiek in beide groepen. De avond van de ingreep komt de coördinerende onderzoeker (Dr Bosteels) langs om te vragen of U zich in staat voelt om naar huis te gaan. Deze beslissing wordt uitsluitend door U genomen. Uiteraard toetst de coördinerende onderzoeker deze beslissing aan de gegevens van temperatuur, pols, bloeddruk en urinedebiet (de zogenaamde vitale parameters). Bij twijfel wordt met U overlegd en wordt altijd beslist in het belang van Uw gezondheid. Uw deelname gaat dan onverminderd verder. U krijgt een formulier mee met beschrijving van mogelijke alarmsymptomen die dringend medisch nazicht via spoedgevallen vereisen. U ontvangt ook een lijst met telefoonnummers voor contact. Gedurende één week wordt U gevraagd om 's morgens en 's avonds de pijn zoals U die beleeft aan te geven via een score (de VAS pijnscore) via een meetlatje. Een pijnverpleegkundige zal U uitleg geven hoe U deze metingen dient uit te voeren en te noteren in het pijndagboek. Bij ontslag wordt U ook een afspraak gegeven voor een controle onderzoek na één week bij één van de twee hoofdonderzoekers. U mag gedurende 4 weken na de ingreep geen sexueel contact hebben. Er wordt tijdelijke werkonbekwaamheid voorgeschreven voor één maand. Een postoperatief controle onderzoek is voorzien na 6 weken. Bij aanvang van de studie en op 3 en 6 maanden na de ingreep moet U een zelfbeoordeling aangeven van pijn bij sexueel contact via een standaard vragenlijst. Tevens kan U een anonieme vragenlijst invullen voor het meten van het sexueel welbevinden bij aanvang van de studie en op 3 en 6 maanden: omdat deze vragenlijst gevoelige vragen bevat is het invullen ervan facultatief. Dit betekent dat het U vrij staat om deze vragenlijst wel of niet in te vullen zonder dat dit het verdere verloop van de studie of de kwaliteit van de toegediende zorg beïnvloedt.

## **Verloop van de studie**

Uw deelname aan de studie neemt 6 maanden in beslag en omvat één bijkomende raadpleging vergeleken met een behandeling zonder deelname aan de studie.

Er worden geen bijkomende procedures vereist in het kader van de studie.

In het kader van Uw deelname aan de studie en rekening houdend met Uw medische situatie, zal de meerderheid van de bezoeken en onderzoeken die we zullen beschrijven, deel uitmaken van de standaardzorgen in ons ziekenhuis terwijl slechts één bijkomend bezoek wordt vereist in het kader van deze studie, namelijk de postoperatieve controle na één week.

**Screeningsfase:** Bij een eerste raadpleging wordt de aanwezigheid van een cyste op één of beide eierstokken vastgesteld. De standaard praktijk is om de blijvende aanwezigheid van deze cyste te herkontrolleren na 6 weken door een expert onderzoeker in de echografie. Blijkt de cyste blijvend aanwezig te zijn dan wordt tijdens het bezoek aan één van de beide lokale onderzoekers waarop de beslissing genomen om één of beide eierstokken te verwijderen overlopen of U voldoet aan de voorwaarden om te mogen deelnemen aan de studie (de in- en exclusiecriteria). De datum voor de geplande ingreep wordt vastgelegd. Het formulier voor geïnformeerde toestemming wordt ondertekend.

**Onderzoeksfase:** de nodige preoperatieve onderzoeken zijn deze welke volgens Uw leeftijd en voorgeschiedenis zijn vastgelegd in het werkdocument opgesteld door de dienst anesthesie. Deze kunnen voorafgaandelijk aan de ingreep door de huisarts worden uitgevoerd. De studie vereist geen bijkomende preoperatieve onderzoeken in vergelijking met de situatie waarin U zou hebben beslist om niet deel te nemen aan deze studie. U kan steeds uit vrije wil beslissen om niet langer deel te nemen aan de studie ook nadat U hiervoor Uw toestemming had gegeven. In dit geval wordt U steeds de standaard zorg verstrekt die dezelfde is als deze die U zou hebben ontvangen wanneer U had beslist om niet aan de studie deel te nemen. De studie wordt beëindigd na zes maanden. Op dat moment kan U van de hoofdonderzoeker (Dr Baekelandt) vernemen via welke techniek de ingreep werd uitgevoerd. Het eerder vrijgeven van deze informatie kan enkel om dringende medische redenen. In dergelijk dringend geval kan Uw deelname aan de studie voor het meten van de studie uitkomsten onveranderd doorgaan tenzij U op vrijwillige basis zou beslissen om verdere deelname aan de studie stop te zetten.

**Opvolgingsfase:** gedurende één week meet U thuis zelf s'morgens en 's avonds de VAS pijnscores en noteert U het gebruik van bijkomende pijnstillende medicatie met vermelding van naam, dosis en wijze van inname. Na één week en na zes weken volgen postoperatieve controles bij de onderzoekers. Op drie en zes maanden wordt U gevraagd om een door een universitair werkzame seksuoloog opgestelde standaard vragen lijst in te vullen en onder gesloten omslag met vermelding van "medisch geheim-vertrouwelijk" terug te zenden naar de onderzoekers.

De studie is volledig beëindigd wanneer U de vragenlijst op 6 maanden hebt teruggestuurd.

Indien u besluit deel te nemen aan de studie en aan alle voorwaarden voor deelname voldoet, ziet het schema van het verloop van Uw deelname aan de NOTABLE studie er uit als volgt:

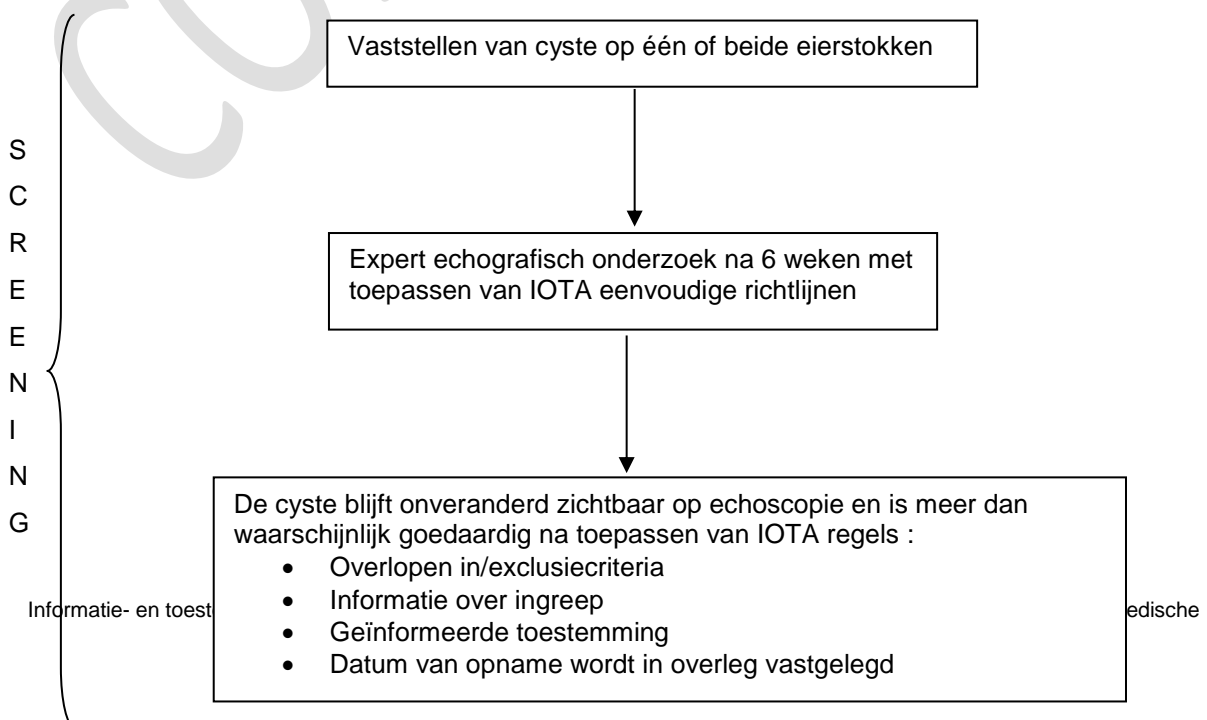

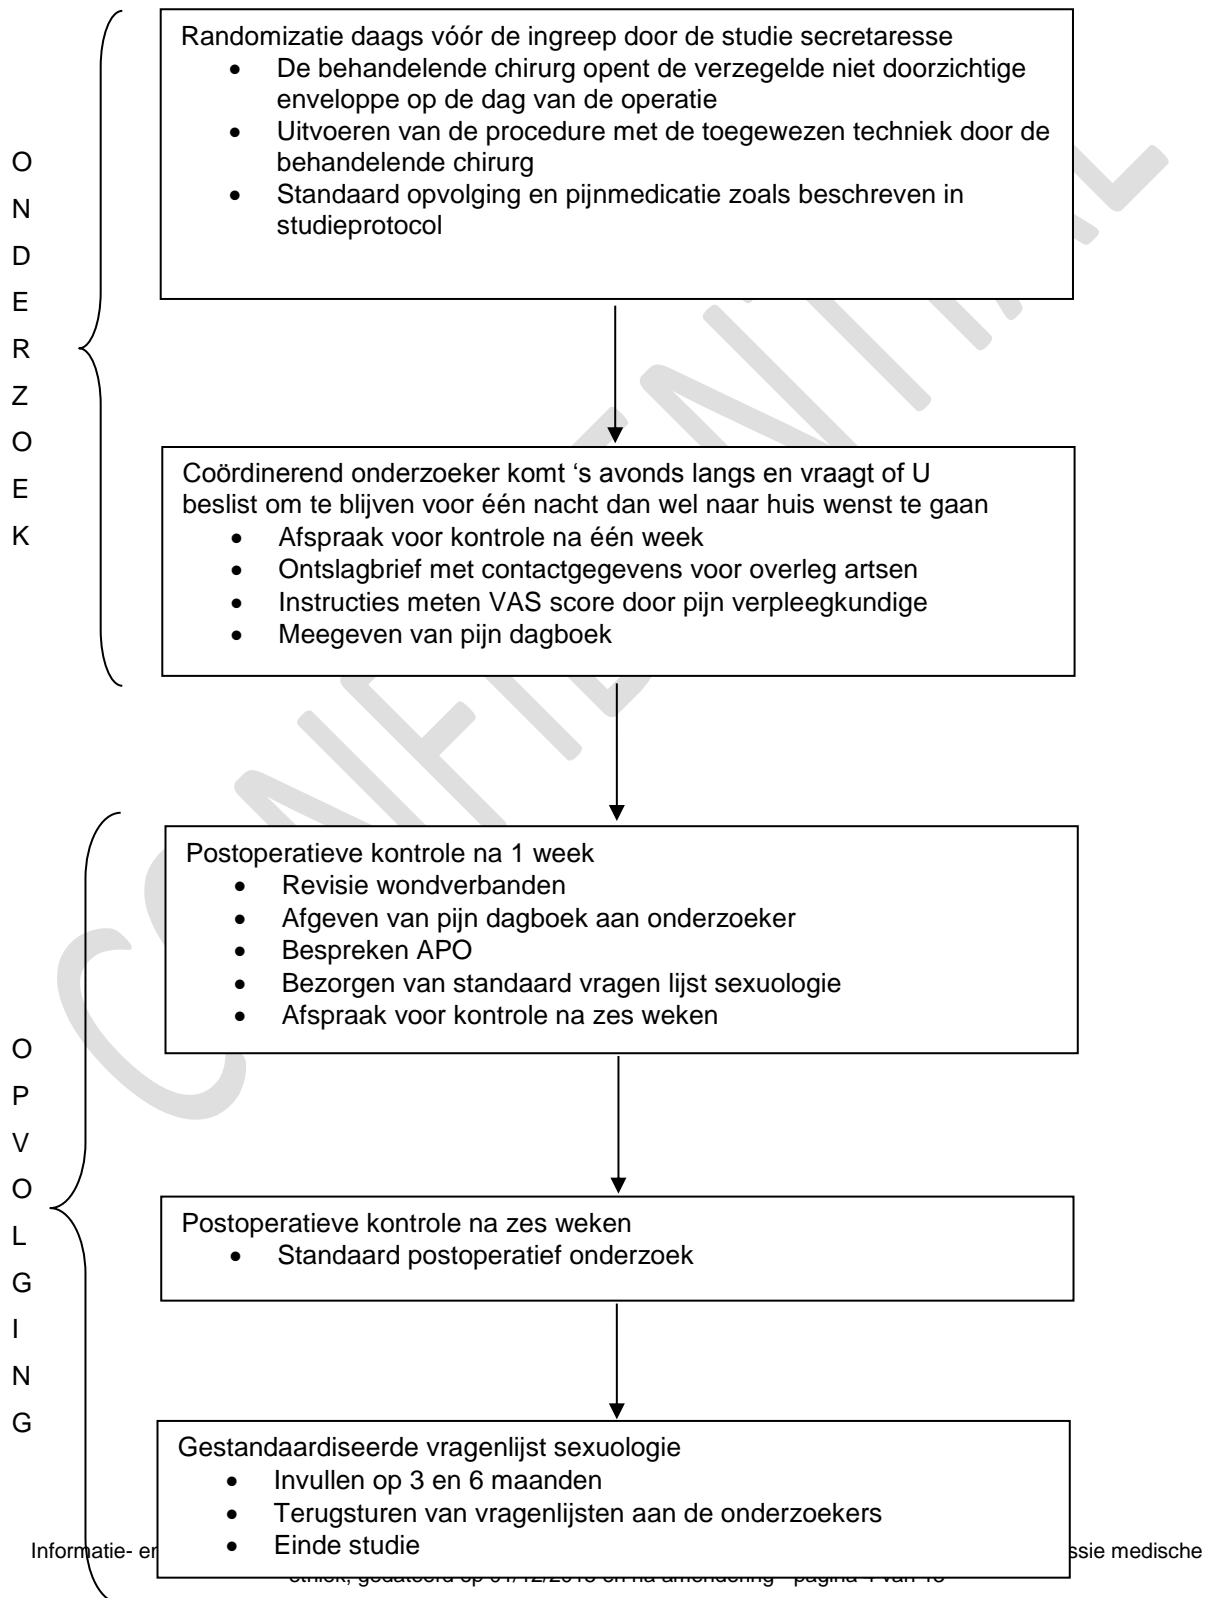

## **Risico's en ongemakken**

### **A: Verwikkelingen van de vNOTES en laparoscopische techniek**

Verwikkelingen tijdens en na minimaal invasieve chirurgie of MIS waartoe zowel de nieuwe vNOTES als de klassieke laparoscopische procedure behoren zijn zeldzaam. In een prospectief onderzoek gepubliceerd door Nederlandse onderzoekers werden 145 verwikkelingen vermeld bij 25 764 laparoscopische ingrepen <sup>(1)</sup>. Ook een groot Fins onderzoek rapporteerde minder dan 1% verwikkelingen na laparoscopische chirurgie <sup>(2)</sup>.

De kansen op onderstaande verwikkelingen zijn als volgt:

- Tijdens de operatie:
  - bloeding (slag)ader buikwand: 15 per 10 000 ingrepen
  - letsel aan darm of maag: 11 per 10 000 ingrepen
  - bloeding (slag) ader buikholte: 10 per 10 000 ingrepen
  - bloeding vliezen rond eileider: 9 per 10 000 ingrepen
  - blaasletsel: 2 per 10 000 ingrepen
  - baarmoederletsel: 1 per 10 000 ingrepen
  - laseraccident: 1 per 10 000 ingrepen
  - overige: <1 per 10 000 ingrepen
  
- Na de operatie:
  - abces: 35 per 100 000 ingrepen
  - breuk: 8 per 100 000 ingrepen
  - longembool: 4 per 100 000 ingrepen
  - overlijden: 8 per 100 000 ingrepen

Ook is het mogelijk dat zich andere risico's en ongemakken voordoen die op dit moment nog onbekend zijn. Het is daarom van groot belang om elke nieuwe gezondheidsklacht zo snel mogelijk aan de arts-onderzoeker te melden, ongeacht of de klacht volgens U of Uw huisarts te maken heeft met de studie of niet.

### **B: Contraceptie, zwangerschap en borstvoeding**

U mag niet deelnemen aan deze studie als u zwanger bent. Indien u kiest om aan deze studie deel te nemen, dient u gebruik te maken van één van de erkende contraceptiemethoden (om te voorkomen dat u zwanger wordt). Uw arts zal met u de verschillende doeltreffende opties bespreken.

### **C: Risico's in verband met de evaluatieprocedures in het kader van de studie.**

Er zijn geen risico's/ongemakken verbonden aan de bijkomende controle één week na de ingreep die in het kader van de studie zal plaatsvinden. Het betreft een gebruikelijk klinisch onderzoek gelijkaardig aan het gewone preventief jaarlijks gynaecologisch onderzoek waarmee U waarschijnlijk voldoende vertrouwd bent.

(1) Jansen FW, Kapiteyn K, Trimbos-Kemper T, Hermans J, Trimbos-Kemper JB. Complications of laparoscopy: a prospective multicenter observational study. Br J Obstet Gynaeco 1997; 104: 595-600.

(2) Harkki-Siren P, Sjoberg J, Kurki T. Major complications of laparoscopy : a follow-up Finnish study. Obstet Gynecol 1999;94:94-98.

### **Melding van nieuwe informatie**

Het is steeds mogelijk dat er tijdens het verloop van een klinische studie belangrijke nieuwe informatie over de transvaginale NOTES procedure beschikbaar wordt zoals dit het geval kan zijn met iedere klinische interventie studie. De onderzoekers verbindt er er zich toe om U desgevallend op de hoogte te brengen van nieuwe belangrijke informatie die een invloed kan hebben op Uw beslissing om Uw deelname aan de studie voort te zetten.

In dat geval zal men U vragen ofwel om een aanvulling bij de toestemmingsverklaring te ondertekenen ofwel om een nieuw informatie- en toestemmingsdocument te ondertekenen. Indien U in het licht van de nieuwe belangrijke informatie zou besluiten om Uw deelname aan de studie te beëindigen, zal Uw arts-onderzoeker erop toezien dat U ook nadien op de best mogelijke wijze behandeld wordt.

### **Voordelen**

Indien U besluit om deze studie deel te nemen, kan de transvaginale NOTES techniek al dan niet gunstig blijken te zijn voor de behandeling van Uw aandoening, het verminderen van de symptomen ervan of het bespoedigen van het pijnvrije herstel na de ingreep.

De informatie, die dankzij dit onderzoek verkregen wordt, kan bijdragen tot een betere kennis van het gebruik van deze vernieuwende chirurgische techniek of tot de ontwikkeling van de NOTES transvaginale chirurgie voor de behandeling van gelijkaardige goedaardige gynaecologische aandoeningen bij toekomstige patiënten.

### **Andere behandelingen**

Het meest gebruikte alternatief voor de nieuwe transvaginale vNOTES techniek is de laparoscopische techniek. Hierbij wordt via een kleine insnede via of onder het navellitteken een laparoscoop of kijkbuis ingebracht die toelaat om de bij U geplande heelkundige behandeling-het operatief verwijderen van één of beide eierstokken voor een goedaardige eierstokcyste- uit te voeren onder rechtstreeks zicht. Deze laparoscopische techniek vervangt de oudere klassieke open of laparotomische techniek, die heden hoofdzakelijk nog omwille van eierstokkanker of heel volumineuze eierstokcysten wordt toegepast.

De arts-onderzoeker zal deze alternatieve behandeling die als standaard klinische praktijk steeds in de controlegroep wordt toegepast eveneens met U bespreken.

### **Stopzetting van de deelname**

Stopzetting van de deelname betekent simpelweg dat U als deelnemer Uw "praktische" deelname stopzet omdat U de aan de studie verbonden verplichtingen te zwaar vindt, de bijwerkingen te onaangenaam vindt of andere.

De deelname kan ook door de arts-onderzoeker worden stopgezet om veiligheidsredenen (evolutie van de ziekte) of andere redenen. Dit wil niet zeggen dat U als deelnemer Uw toestemming inzake de verzameling van aanvullende gegevens stopzet (indien U de arts-onderzoeker blijft bezoeken, die vaak ook Uw verwezen arts is voor de ziekte die in het kader van de klinische studie wordt behandeld).

Intrekking van de toestemming tot de studie betekent dat de deelnemer zijn/haar toestemming tot deelname aan de studie effectief intrekt. Dit kan zonder opgave van redenen en het kan betekenen dat de deelnemer zijn/haar toestemming inzake de verwerking van zijn/haar gezondheidsgegevens intrekt.

Uw deelname is vrijwillig. U hebt steeds het recht om Uw deelname aan de studie om eender welke reden en zonder opgave van redenen stop te zetten. Wel kan het voor de arts-onderzoeker en de opdrachtgever nuttig zijn om te weten of U zich terugtrekt omdat de aan de studiebehandeling verbonden beperkingen te zwaar zijn (bijvoorbeeld te veel onaangename bijwerkingen, te veel follow-up bezoeken).

Het is ook mogelijk dat de arts-onderzoeker Uw deelname aan de studie stopzet omdat hij van mening is dat dit beter is voor Uw gezondheid of omdat hij vaststelt dat U zich niet aan de voorschriften voor deelname houdt.

Ook gebeurt het soms dat de bevoegde nationale of internationale autoriteiten, de ethische comités die aanvankelijk goedkeuring hadden gegeven voor de studie of de opdrachtgever de studie stopzetten omdat uit de verzamelde informatie blijkt dat de behandeling niet werkt (de gezondheid van de deelnemers verbetert niet voldoende) of dat de onderzochte behandeling meer of ernstigere bijwerkingen veroorzaakt dan verwacht of voor een andere reden zoals bijvoorbeeld de beslissing om de studie en de ontwikkeling van het onderzochte studiegeneesmiddel stop te zetten.

### **Behandeling na stopzetting van de studie**

In alle situaties waarbij de deelname aan de studie wordt stopgezet, maar ook wanneer de studie volgens planning is afgerond, zal Uw arts-onderzoeker Uw gezondheid onderzoeken en U de beste behandeling die beschikbaar is voorschrijven.

### **Biologische stalen die tijdens de studie worden afgenomen**

De verwijderde weefsels worden volgens standaard klinische praktijk onderzocht op het labo pathologische ontleedkunde voor het microscopisch bevestigen van de goedaardigheid van de vastgestelde eierstokcyste. Hetzelfde geldt voor andere weefselvuchten of biopsies. Deze worden standaard afgenomen als onderdeel van de behandeling (verwijderen van één of beide eierstokken) en deze praktijk zou ook worden toegepast indien U geen toestemming zou hebben gegeven voor deelname aan de studie.

### **Indien u aan deze studie deelneemt, vragen wij u het volgende:**

- Tenvolle mee te werken voor een correct verloop van de studie.
- Geen informatie over Uw gezondheidstoestand, de geneesmiddelen die U gebruikt of de symptomen die U ervaart te minimaliseren of zelfs te verzwijgen.
- Niet deel te nemen aan een andere klinische studie met een experimentele behandeling - ongeacht of het een studiegeneesmiddel, medisch hulpmiddel of een procedure betreft- tijdens Uw deelname aan de huidige studie.
- Steeds uw "deelnemerskaart" bij u dragen. Dit is verplicht voor Uw veiligheid indien U een spoedbehandeling moet ondergaan in een ziekenhuis waar men U niet kent. Deze kaart vermeldt tevens de contactgegevens van de behandelende onderzoekers.

### **U moet eveneens weten dat:**

het voor Uw veiligheid aangewezen is om Uw huisarts of andere behandelende artsen die bij Uw behandeling betrokken zijn te informeren over Uw deelname aan deze studie. Wij vragen U eveneens om hiervoor Uw toestemming te geven. Indien U echter niet wenst dat zij hierover worden geïnformeerd om welke reden ook, zullen wij Uw keuze respecteren.

### **Contact**

Als U bijkomende informatie wenst, maar ook ingeval van problemen of als U zich zorgen maakt, kan U contact opnemen met de arts-onderzoekers Dr Jan Baekelandt of Dr. Jan Bosteels of de studiesecretaresse via de op de deelnemerskaart aangegeven contactgegevens of via het centraal telefoonnummer van het Imeldaziekenhuis (015 505011) of het onthaal van de dienst spoedgevallen buiten de klassieke werkuren (015 505040).

In geval van nood, kan U contact opnemen met de dienst spoedgevallen op het telefoonnummer 015 505040.

Buiten de consultatie-uren moet u zich aanmelden op de spoedafdeling van Uw ziekenhuis en vermelden dat U deelneemt aan een klinische studie. Uw dossier zal nuttige informatie bevatten voor de behandelde arts met betrekking tot de studie.

Als U vragen hebt met betrekking tot Uw rechten als deelnemer aan de studie, kan U contact opnemen met de ombudsdienst van het Imeldaziekenhuis (Mevrouw Ilse Creemers) op het telefoonnummer: 015 505015. Indien nodig kan de ombudsvrouw U in contact brengen met het Ethisch Comité

Titel van de studie: **NOTES adnexectomie voor benigne aandoeningen vergeleken met laparoscopische excisie**

## II Geïnformeerde toestemming

### Deelnemer

Ik verklaar dat ik geïnformeerd ben over de aard, het doel, de duur, de eventuele voordelen en risico's van de studie en dat ik weet wat van mij wordt verwacht. Ik heb kennis genomen van het informatiedocument en de bijlagen ervan.

Ik heb voldoende tijd gehad om na te denken en met een door mij gekozen persoon, zoals mijn huisarts of een familielid, te praten.

Ik heb alle vragen kunnen stellen die bij me opkwamen en ik heb een duidelijk antwoord gekregen op mijn vragen.

Ik begrijp dat mijn deelname aan deze studie vrijwillig is en dat ik vrij ben mijn deelname aan deze studie stop te zetten zonder dat dit mijn relatie schaadt met het therapeutisch team dat instaat voor mijn gezondheid.

Ik begrijp dat er tijdens mijn deelname aan deze studie gegevens over mij zullen worden verzameld en dat de arts-onderzoeker en de opdrachtgever de vertrouwelijkheid van deze gegevens verzekeren overeenkomstig de Belgische wetgeving ter zake.

Ik stem in met de verwerking van mijn persoonlijke gegevens volgens de modaliteiten die zijn beschreven in de rubriek over het verzekeren van de vertrouwelijkheid. Ik geef ook toestemming voor de overdracht naar en verwerking van mijn gecodeerde gegevens in andere landen dan België.

Ik ga ermee akkoord / Ik ga er niet mee akkoord (doorhalen wat niet van toepassing is) dat de studiegegevens die voor de hier vermelde studie worden verzameld, later zullen worden verwerkt, op voorwaarde dat deze verwerking beperkt blijft tot de context van de hier vermelde studie voor een betere kennis van de ziekte en de behandeling ervan.

Ik ga ermee akkoord / Ik ga er niet mee akkoord (doorhalen wat niet van toepassing is) dat mijn huisarts en andere specialisten die betrokken zijn bij mijn behandeling op de hoogte worden gesteld van mijn deelname aan deze klinische studie.

Ik heb een exemplaar ontvangen van de informatie aan de deelnemer en de geïnformeerde toestemming.

Naam, voornaam, datum en handtekening van de deelnemer



**Wettelijke vertegenwoordiger**

Ik verklaar dat men mij heeft geïnformeerd over de vraag om een beslissing te nemen over deelname aan de klinische studie door de persoon die ik in diens beste belang vertegenwoordig, rekening houdend met zijn of haar mogelijke wens. Mijn toestemming is van toepassing op alle items opgenomen in het toestemmingsformulier voor de deelnemer.

Ik ben eveneens geïnformeerd dat zodra de klinische situatie het toelaat, de persoon die ik vertegenwoordig op de hoogte zal worden gesteld van zijn/haar deelname aan een klinisch studie en op dat moment vrij is om toestemming te geven voor een verdere deelname of om deelname stop te zetten door het huidige toestemmingsformulier al dan niet te ondertekenen

Ik heb een exemplaar ontvangen van de informatie aan de deelnemer en de geïnformeerde toestemming.

Naam, voornaam en verwantschap met de vertegenwoordigde persoon:

Datum en handtekening van de wettelijke vertegenwoordiger

**Getuige / Tolk**

Ik ben tijdens het volledige proces van informatieverstrekking aan de deelnemer aanwezig geweest en ik bevestig dat de informatie over de doelstellingen en procedures van de studie op adequate wijze is verstrekt, dat de deelnemer (of diens wettelijke vertegenwoordiger) de studie naar alle waarschijnlijkheid heeft begrepen en dat de toestemming tot deelname aan de studie uit vrije wil is gegeven.

Naam, voornaam en hoedanigheid van de getuige:

Datum en handtekening van de getuige / tolk

**Arts-onderzoeker**

Ik ondergetekende, ....., arts-onderzoeker, verklaar de benodigde informatie inzake deze studie mondeling te hebben verstrekt evenals een exemplaar van het informatiedocument aan de deelnemer te hebben verstrekt.

Ik bevestig dat geen enkele druk op de deelnemer is uitgeoefend om haar te doen toestemmen tot deelname aan de studie en ik ben bereid om op alle eventuele bijkomende vragen te antwoorden.

Ik bevestig dat ik werk in overeenstemming met de ethische beginselen zoals vermeld in de laatste versie van de "Verklaring van Helsinki", de "Goede klinische praktijk" en de Belgische wet van 7 mei 2004 inzake experimenten op de menselijke persoon.

Naam, Voornaam, Datum en handtekening van de vertegenwoordiger van de arts-onderzoeker

Naam, Voornaam, Datum en handtekening  
van de vertegenwoordiger  
van de arts-onderzoeker

Naam, Voornaam, Datum en handtekening  
van de arts-onderzoeker

Titel van de studie: **NOTES adnexectomie voor benigne aandoeningen vergeleken met laparoscopische excisie**

### **III Aanvullende informatie**

#### **1 : Aanvullende informatie over de organisatie van de studie**

Nagenoeg alle bezoeken / -consultaties en -procedures waarvan de resultaten eventueel voor de studie worden gebruikt vallen onder de huidige standaard klinische zorg. Enkel de het postoperatief bezoek één week na de ingreep is bijkomend in het kader van de studie. Hierbij worden geen bijkomende technische onderzoeken voorzien die belastend of gezondheidsrisico's inhouden voor de deelnemer. Bij vaststellen van postoperatieve complicaties worden bijkomende bloednames of technische onderzoeken gepland analoog aan deze die ook zouden worden gepland voor een gelijkaardige complicatie indien de deelnemer geen geïnformeerde toestemming zou hebben gegeven voor deelname aan de studie.

## **2. Aanvullende informatie over de risico's die verbonden zijn aan deelname aan de studie**

Verklarende begrippen over het voorkomen van verwickelingen:

|           |                                                                     |
|-----------|---------------------------------------------------------------------|
| Zeer vaak | Bij meer dan 1 op de 10 patiënten                                   |
| Vaak      | Bij meer dan 1 op de 100, maar minder dan 1 op de 10 patiënten      |
| Soms      | Bij meer dan 1 op de 1000, maar minder dan 1 op de 100 patiënten    |
| Zelden    | Bij meer dan 1 op de 10 000, maar minder dan 1 op de 1000 patiënten |

Wanneer gekozen wordt voor een ingreep langs vaginale weg, zal de buikholte worden geopend langs de schede door een insnede te maken in de omslagplooi van de Douglassholte. Men spreekt van een achterste colpotomie. Op deze plaats grenst het diepste punt van de buikholte aan het diepste punt van de schede. Vroeger werd deze toegang gebruikt om ingrepen aan de eierstokken of eileiders uit te voeren. Zo werd in het verleden voor de opkomst van de laparoscopie een sterilisatie uitgevoerd via een colpotomie. Precieze gegevens over het voorkomen van verwickelingen na een colpotomie zijn bekend in het kader van een eileidersterilisatie:

- morbiditeit of totaal aantal verwickelingen door bloeding, infectie: minder dan 5 op 100
- mortaliteit of sterfte: minder dan 4 op 100 000

Andere zeldzame verwickelingen die in minder dan 1 op 100 ingrepen voorkomen zijn:

- acuut compartiment syndroom bij ingrepen die langer dan drie uur duren
- ileus of vertraagd of niet op gang komen van de darmactiviteit
- obstipatie of fecale impactie
- oligurie of minder goed kunnen plassen
- ernstige infecties zoals septische shock, necrotiserende fascitis
- longontsteking
- platvallen van de longbases of atelectasis
- openvallen van de colpotomie wonde of dehiscentie
- achterlaten van een vreemd voorwerp zoals een wondcompres
- niet vermoede kanker van eileider of eierstok
- ernstige emotionele of psychologische stoornissen zoals verwardheid of depressie

### **Contraceptie, zwangerschap bij de deelnemster.**

Zwangere vrouwen kunnen niet deelnemen aan de studie.

### **Risico's in verband met de klinische onderzoeksprocedures**

De **bloedafname** die nodig is voor het preoperatief onderzoek is hetzelfde als dat wat zou worden uitgevoerd indien U zou moeten worden behandeld zonder dat U geïnformeerde toestemming gaf voor deelname aan de studie. Deze bloedname kan (in zeldzame gevallen) pijn, bloedingen, bloeduitstortingen of een lokale infectie op de plek van bloedafname veroorzaken. Ook kunnen sommige deelnemers zich duizelig voelen of flauwvallen tijdens de afname. Het personeel dat de bloedafname uitvoert, zal alles in het werk stellen om deze ongemakken te beperken.

### **3 : Aanvullende informatie over de bescherming en de rechten van deelnemers aan een klinische studie**

#### ***Ethische comités***

Deze studie werd geëvalueerd door het onafhankelijk ethisch comité van het Imeldaziekenhuis dat een gunstig advies heeft uitgebracht op 1 december 2015. De ethische comités hebben als taak de personen die aan klinische studies deelnemen te beschermen. Ze controleren of uw rechten als patiënt en als deelnemer aan een studie gerespecteerd worden, of - uitgaande van de huidige kennis - de balans tussen risico's en voordelen gunstig is voor de deelnemers, of de studie wetenschappelijk relevant en ethisch verantwoord is.

Hierover brengen de ethische comités een advies uit in overeenstemming met de Belgische wet van 7 mei 2004.

U dient het positief advies van de Ethische Comités in geen geval te beschouwen als een aansporing om deel te nemen aan deze studie.

#### ***Vrijwillige deelname***

Aarzel niet om alle vragen te stellen die bij U opkomen voordat U tekent. Neem de tijd om er over te praten met een vertrouwenspersoon indien U dat wenst.

U heeft het recht om niet deel te nemen aan deze studie of met deze studie te stoppen, zonder dat U hiervoor een reden hoeft te geven, zelfs al hebt U eerder toegestemd om aan deze studie deel te nemen. Uw beslissing zal in geen geval Uw relatie met de arts-onderzoeker beïnvloeden, noch de kwaliteit van uw verdere verzorging.

Als U aanvaardt om aan deze studie deel te nemen, ondertekent U het toestemmingsformulier. De arts-onderzoeker zal dit formulier ook ondertekenen en zal zo bevestigen dat hij U de noodzakelijke informatie over deze studie heeft gegeven. U zal het voor U bestemde exemplaar ontvangen.

Voor Uw veiligheid is het wel aanbevolen om de arts-onderzoeker op de hoogte te stellen indien U besluit Uw deelname aan de studie stop te zetten.

#### ***Kosten in verband met uw deelname***

Deze studie is een niet-commerciële studie.

Alle kosten staan in verband met gebruikelijke medische prestaties in uw klinische situatie en deze worden na facturatie terugbetaald door de mutualiteiten en de verzekeringsmaatschappij. Het gaat namelijk om een heelkundige behandeling die standaard voor dit gezondheidsprobleem wordt toegepast en die eveneens zou moeten gebeuren indien U niet aan de huidige studie zou deelnemen.

De bijkomende postoperatieve controle na één week is buiten de standaard klinische praktijk: de kostprijs van deze raadpleging zal niet worden aangerekend behalve indien er tijdens dit onderzoek verwikkelingen zouden worden opgemerkt die verdere technische onderzoeken of behandeling zouden vereisen welke ook buiten Uw deelname aan deze studie op gelijkaardige manier zouden worden behandeld. Uw verplaatsingskosten voor deze bijkomende raadpleging worden niet vergoed. Neem contact op met het studieteam voor de praktische uitvoering.

#### ***Vertrouwelijkheidsgarantie***

Uw deelname aan de studie betekent dat U ermee akkoord gaat dat de arts-onderzoeker gegevens over U verzamelt en dat de opdrachtgever van de studie die gebruikt voor onderzoek en in het kader van wetenschappelijke en medische publicaties.

U hebt het recht om aan de arts-onderzoeker te vragen welke gegevens hij over U heeft verzameld en waarvoor ze gebruikt worden in het kader van de studie. Deze gegevens hebben betrekking op Uw huidige klinische situatie maar ook op Uw medische voorgeschiedenis en op de resultaten van onderzoeken die werden uitgevoerd voor de behandeling van Uw gezondheid volgens de geldende zorgstandaard. U hebt het recht om deze gegevens in te kijken en om verbeteringen te laten aanbrengen indien ze foutief zouden zijn.

Uw recht op inzage wordt minstens tot één week na de ingreep uitgesteld (ideaal tot na afloop van de studie op zes maanden) om een correct verloop van de studie te garanderen. Het eerder bekend maken van de gebruikte techniek kan leiden tot voorkennis die de resultaten van de pijnscore metingen die binnen de eerste week moeten worden gemeten, betekenisvol beïnvloeden wat leidt tot foutieve resultaten en besluiten over de doeltreffendheid van de transvaginale benadering vergeleken met de standaard laparoscopische benadering.

De arts-onderzoeker is verplicht om deze verzamelde gegevens vertrouwelijk te behandelen.

Dit betekent dat hij zich ertoe verbindt om Uw naam nooit bekend te maken bijvoorbeeld in het kader van een publicatie of een conferentie en dat hij Uw gegevens zal coderen (Uw identiteit zal worden vervangen door een identificatiecode in de studie). De data van Uw deelname aan de studie zijn klinische data die worden bewaard in Uw elektronisch patiënten dossier.

De arts-onderzoeker en zijn team zullen gedurende de volledige klinische studie de enige personen zijn met toegang tot Uw studie dossier).

De gepubliceerde persoonlijke gegevens omvatten geen combinatie van elementen waarmee het mogelijk is U te identificeren.

Alle onderzoekers betrokken bij deze studie behandelen Uw gegevens in overeenstemming met de Belgische wet betreffende de bescherming van de persoonlijke levenssfeer.

Om de kwaliteit van de studie te controleren, kan uw medisch dossier worden ingekeken door personen die gebonden zijn aan het beroepsgeheim zoals vertegenwoordigers van de ethische comités of een extern auditbureau. Dit kan enkel gebeuren onder strikte voorwaarden, onder de verantwoordelijkheid van de arts-onderzoeker en onder zijn toezicht (of van één van zijn onderzoeksmedewerkers).

De (gecodeerde) onderzoeksgegevens kunnen doorgegeven worden aan Belgische of andere regelgevende instanties, aan de betrokken ethische comités, aan andere artsen en/of instellingen die samenwerken met de onderzoekers.

Uw toestemming om aan deze studie deel te nemen betekent dus ook dat U akkoord gaat dat Uw gecodeerde medische gegevens gebruikt worden voor doeleinden die in dit informatieformulier beschreven staan en dat ze overgedragen worden aan bovenvermelde personen en/of instellingen.

De onderzoekers zullen de verzamelde gegevens gebruiken in het kader van de studie waaraan U deelneemt, maar willen ze ook kunnen aanwenden in het kader van andere studies over dezelfde ziekte als de Uwe. Buiten de context die beschreven wordt in dit document, kunnen Uw gegevens enkel gebruikt worden als een ethisch comité haar goedkeuring heeft gegeven.

Indien u uw toestemming tot deelname aan de studie intrekt, zullen de gecodeerde gegevens die al verzameld waren vóór uw terugtrekking, bewaard worden. Hierdoor wordt de geldigheid van de studie gegarandeerd.

### **Verzekering**

Elke deelname aan een studie houdt een risico in, hoe klein ook. De onderzoeker is - ook indien er geen sprake is van fout - aansprakelijk voor de schade die de deelnemer of in geval van overlijden haar rechthebbenden, oplopen en die rechtstreeks of onrechtstreeks verband houdt met diens deelname aan de studie. U moet hiervoor dus geen fout aantonen. De opdrachtgever heeft voor deze aansprakelijkheid een verzekering afgesloten

We verzoeken U daarom om elk nieuw gezondheidsprobleem aan de arts-onderzoeker te melden. Hij kan U aanvullende informatie verstrekken over mogelijke behandelingen.

Indien de arts-onderzoeker van mening is dat er een verband met de studie mogelijk is (er is geen verband met de studie bij schade ten gevolge van het natuurlijke verloop van Uw ziekte of ten gevolge van gekende bijwerkingen van uw standaardbehandeling), zal aangifteprocedure bij de verzekering worden opgestart. Deze zal, indien zij het nodig acht, een expert aanstellen om een oordeel uit te spreken over het verband tussen Uw nieuwe gezondheidsklachten en de studie.

In het geval van onenigheid met de arts-onderzoeker of met de door de verzekeringsmaatschappij aangestelde expert, en steeds wanneer U dit nodig acht, kunnen U of in geval van overlijden Uw rechthebbenden de verzekeraar rechtstreeks in België dagvaarden dagvaarden (NV VANBREDA RISK & BENEFITS (Liability / Fleet with premium), polisnummer LXX048196 , Plantin en Moretuslei 297, 2140 Borgerhout, Tel 03/2176767).

De wet voorziet dat de dagvaarding van de verzekeraar kan gebeuren ofwel voor de rechter van de plaats waar de schadeverwekkende feiten zich hebben voorgedaan, ofwel voor de rechter van Uw woonplaats, ofwel voor de rechter van de zetel van de verzekeraar.
